# Supplementary material for: Proteome and Interactome Linked to Metabolism, Genetic Information Processing, and Abiotic Stress in Gametophytes of Two Woodferns
Source: Preprints.org preprint supplement (doi:10.20944/preprints202306.1844.v1), 2023-06-27
Supplement: Supplementary file 2 [file supplementary]

**Table S1.** Strongest STRING interactions of proteins extracted from gametophytes of *Dryopteris* *affinis* and *D. oreades* and classified in the following groups: metabolism of carbohydrates, biosynthesis of amino acids, metabolism of energy and of secondary compounds, transcription and translation, and transport.

| **Node 1** | | **Node 2** | | | | **Neighborhood** | | | | **Gene fusion** | | | | | **Co-occurrence** | | | | **Co-expression** | | | | **Experiments** | | | | **Database** | | | **Textmining** | | | | **Score** |
| --- | --- | --- | --- | --- | --- | --- | --- | --- | --- | --- | --- | --- | --- | --- | --- | --- | --- | --- | --- | --- | --- | --- | --- | --- | --- | --- | --- | --- | --- | --- | --- | --- | --- | --- |
| **METABOLISM OF CARBOHYDRATES** | | | | | | | | | | | | | | | | | | | | | | | | | | | | | | | | | | |
| *AT2G20420* | | *AT5G08300* | | | | 0.19 | | | | 0.389 | | | | | 0.448 | | | | 0.949 | | | | 0.969 | | | | 0.949 | | | 0.965 | | | | 0.999 |
| *AT2G20420* | | *AT4G26910* | | | | 0.162 | | | | 0 | | | | | 0 | | | | 0.916 | | | | 0.526 | | | | 0.974 | | | 0.714 | | | | 0.999 |
| *AT4G26910* | | *AT5G08300* | | | | 0.189 | | | | 0.007 | | | | | 0 | | | | 0.926 | | | | 0.374 | | | | 0.972 | | | 0.637 | | | | 0.999 |
| *At1g01090* | | *MAB1* | | | | 0 | | | | 0.69 | | | | | 0.447 | | | | 0.903 | | | | 0.942 | | | | 0.934 | | | 0.817 | | | | 0.999 |
| *At1g59900* | | *MAB1* | | | | 0 | | | | 0.454 | | | | | 0.448 | | | | 0.903 | | | | 0.942 | | | | 0.934 | | | 0.823 | | | | 0.999 |
| *PGK1* | | *TPI* | | | | 0.19 | | | | 0.517 | | | | | 0 | | | | 0.91 | | | | 0.419 | | | | 0.932 | | | 0.729 | | | | 0.999 |
| *AT1G54220* | | *MAB1* | | | | 0.173 | | | | 0.005 | | | | | 0.422 | | | | 0.838 | | | | 0.771 | | | | 0.867 | | | 0.776 | | | | 0.999 |
| **BIOSYNTHESIS OF AMINO ACIDS** | | | | | | | | | | | | | | | | | | | | | | | | | | | | | | | | | | |
| *AT3G23940* | | *IMS1* | | | | 0.19 | | | | 0 | | | | | 0.238 | | | | 0.254 | | | | 0 | | | | 0.973 | | | 0.803 | | | | 0.997 |
| *IIL1* | | *IMD2* | | | | 0.173 | | | | 0.102 | | | | | 0.369 | | | | 0.468 | | | | 0.195 | | | | 0.973 | | | 0.544 | | | | 0.996 |
| *AT1G11860* | | *SHM3* | | | | 0.19 | | | | 0 | | | | | 0 | | | | 0.336 | | | | 0.692 | | | | 0.932 | | | 0.563 | | | | 0.994 |
| *IIL1* | | *IMS1* | | | | 0.185 | | | | 0 | | | | | 0 | | | | 0.455 | | | | 0.214 | | | | 0.973 | | | 0.43 | | | | 0.993 |
| *ATMS1* | | *MTO3* | | | | 0.19 | | | | 0 | | | | | 0 | | | | 0.714 | | | | 0.061 | | | | 0.884 | | | 0.761 | | | | 0.992 |
| **METABOLISM OF ENERGY** | | | | | | | | | | | | | | | | | | | | | | | | | | | | | | | | | | |
| *AGT* | | *GOX2* | | | | 0 | | | | 0 | | | | | 0 | | | | 0.961 | | | | 0.647 | | | | 0.966 | | | 0.684 | | | | 0.999 |
| *ATPC1* | | *ATPE* | | | | 0.19 | | | | 0 | | | | | 0 | | | | 0.908 | | | | 0.867 | | | | 0.843 | | | 0.615 | | | | 0.999 |
| *ATPC1* | | *PB* | | | | 0.173 | | | | 0 | | | | | 0.432 | | | | 0.901 | | | | 0.905 | | | | 0.896 | | | 0.612 | | | | 0.999 |
| *ATPE* | | *PB* | | | | 0.18 | | | | 0.15 | | | | | 0 | | | | 0.985 | | | | 0.646 | | | | 0.837 | | | 0.966 | | | | 0.999 |
| *ATP1* | | *ATPC1* | | | | 0.19 | | | | 0 | | | | | 0.395 | | | | 0.903 | | | | 0.846 | | | | 0.834 | | | 0.673 | | | | 0.999 |
| *PSAA* | | *PSAC* | | | | 0 | | | | 0 | | | | | 0.33 | | | | 0.503 | | | | 0.995 | | | | 0.8 | | | 0.977 | | | | 0.999 |
| *ATP1* | | *ATPE* | | | | 0.19 | | | | 0 | | | | | 0 | | | | 0.906 | | | | 0.736 | | | | 0.843 | | | 0.916 | | | | 0.999 |
| *ATPA* | | *ATPC1* | | | | 0.19 | | | | 0 | | | | | 0.421 | | | | 0.903 | | | | 0.919 | | | | 0.834 | | | 0.647 | | | | 0.999 |
| *ATPA* | | *ATPE* | | | | 0.19 | | | | 0 | | | | | 0 | | | | 0.931 | | | | 0.736 | | | | 0.843 | | | 0.922 | | | | 0.999 |
| *PSBO2* | | *PSBP-1* | | | | 0 | | | | 0 | | | | | 0 | | | | 0.888 | | | | 0.669 | | | | 0.36 | | | 0.992 | | | | 0.999 |
| *ATPA* | | *PB* | | | | 0.173 | | | | 0 | | | | | 0.445 | | | | 0.957 | | | | 0.905 | | | | 0.829 | | | 0.969 | | | | 0.999 |
| *AT5G08680* | | *ATPC1* | | | | 0.173 | | | | 0 | | | | | 0.427 | | | | 0.901 | | | | 0.818 | | | | 0.829 | | | 0.587 | | | | 0.999 |
| **METABOLISM OF SECONDARY COMPOUNDS** | | | | | | | | | | | | | | | | | | | | | | | | | | | | | | | | | | |
| *4CL3* | *TT5* | | | | 0 | | | | 0 | | | | 0 | | | | 0.843 | | | | 0 | | | | 0 | | | | 0.685 | | | 0.948 | | |
| *4CL3* | *PAL1* | | | | 0.08 | | | | 0 | | | | 0 | | | | 0.145 | | | | 0 | | | | 0.745 | | | | 0.763 | | | 0.946 | | |
| *4CL3* | *PAL4* | | | | 0.08 | | | | 0 | | | | 0 | | | | 0.041 | | | | 0 | | | | 0.745 | | | | 0.717 | | | 0.928 | | |
| **Node 1** | | **Node 2** | | | | **Neighborhood** | | | | **Gene fusion** | | | | | **Co-occurrence** | | | | **Co-expression** | | | | **Experiments** | | | | **Database** | | | **Textmining** | | | | **Score** |
| **METABOLISM OF SECONDARY COMPOUNDS** *(Cont.)* | | | | | | | | | | | | | | | | | | | | | | | | | | | | | | | | | | |
| *PAL1* | *PAL4* | | | | 0 | | | | 0 | | | | 0.449 | | | | 0.167 | | | | 0.787 | | | | 0 | | | | 0.911 | | | 0.819 | | |
| **TRANSCRIPTION AND TRANSLATION** | | | | | | | | | | | | | | | | | | | | | | | | | | | | | | | | | | |
| *AT1G26880* | | | *AT1G27400* | | | | 0.19 | | | | 0 | | | 0 | | | | 0.986 | | | | 0.867 | | | | 0.665 | | | | 0.415 | | | | 0.999 |
| *AT1G26880* | | | *RPL5B* | | | | 0.19 | | | | 0 | | | 0 | | | | 0.968 | | | | 0.867 | | | | 0.667 | | | | 0.391 | | | | 0.999 |
| *AT1G26880* | | | *AT4G10450* | | | | 0.19 | | | | 0 | | | 0 | | | | 0.982 | | | | 0.847 | | | | 0.643 | | | | 0.536 | | | | 0.999 |
| *AT1G26880* | | | *RPL23AB* | | | | 0.19 | | | | 0 | | | 0 | | | | 0.986 | | | | 0.867 | | | | 0.665 | | | | 0.848 | | | | 0.999 |
| *AT1G26880* | | | *AT2G37190* | | | | 0 | | | | 0 | | | 0 | | | | 0.986 | | | | 0.847 | | | | 0.64 | | | | 0.106 | | | | 0.999 |
| *AT1G26880* | | | *AT1G77940* | | | | 0 | | | | 0 | | | 0 | | | | 0.977 | | | | 0.82 | | | | 0.638 | | | | 0.479 | | | | 0.999 |
| *AT1G26880* | | | *AT2G34480* | | | | 0 | | | | 0 | | | 0 | | | | 0.982 | | | | 0.82 | | | | 0.639 | | | | 0.327 | | | | 0.999 |
| *AT1G26880* | | | *AT3G62870* | | | | 0 | | | | 0 | | | 0 | | | | 0.982 | | | | 0.867 | | | | 0.656 | | | | 0.326 | | | | 0.999 |
| *AT1G26880* | | | *AT3G05560* | | | | 0 | | | | 0 | | | 0 | | | | 0.985 | | | | 0.847 | | | | 0.488 | | | | 0.411 | | | | 0.999 |
| *AT1G26880* | | | *AT2G20450* | | | | 0.182 | | | | 0 | | | 0 | | | | 0.986 | | | | 0.867 | | | | 0.665 | | | | 0.894 | | | | 0.999 |
| *AT1G26880* | | | *AT2G37600* | | | | 0 | | | | 0 | | | 0 | | | | 0.983 | | | | 0.847 | | | | 0.651 | | | | 0.511 | | | | 0.999 |
| *AT1G26880* | | | *AT4G15000* | | | | 0.182 | | | | 0 | | | 0 | | | | 0.985 | | | | 0.847 | | | | 0.649 | | | | 0.577 | | | | 0.999 |
| *AT1G26880* | | | *RPL18* | | | | 0 | | | | 0 | | | 0 | | | | 0.986 | | | | 0.847 | | | | 0.648 | | | | 0.416 | | | | 0.999 |
| *AT1G26880* | | | *AT1G41880* | | | | 0 | | | | 0 | | | 0 | | | | 0.985 | | | | 0.82 | | | | 0.638 | | | | 0.172 | | | | 0.999 |
| *AT1G27400* | | | *AT1G41880* | | | | 0 | | | | 0 | | | 0 | | | | 0.985 | | | | 0.853 | | | | 0.661 | | | | 0.393 | | | | 0.999 |
| *AT1G27400* | | | *RPL18* | | | | 0 | | | | 0 | | | 0 | | | | 0.986 | | | | 0.867 | | | | 0.673 | | | | 0.494 | | | | 0.999 |
| *AT1G27400* | | | *AT4G15000* | | | | 0.173 | | | | 0 | | | 0 | | | | 0.985 | | | | 0.867 | | | | 0.673 | | | | 0.51 | | | | 0.999 |
| *AT1G27400* | | | *AT2G37600* | | | | 0 | | | | 0 | | | 0 | | | | 0.98 | | | | 0.867 | | | | 0.673 | | | | 0.155 | | | | 0.999 |
| *AT1G27400* | | | *AT2G20450* | | | | 0.173 | | | | 0 | | | 0 | | | | 0.986 | | | | 0.877 | | | | 0.676 | | | | 0.599 | | | | 0.999 |
| *AT1G27400* | | | *AT3G05560* | | | | 0 | | | | 0 | | | 0 | | | | 0.985 | | | | 0.867 | | | | 0.673 | | | | 0.516 | | | | 0.999 |
| *AT1G27400* | | | *AT5G58420* | | | | 0.19 | | | | 0 | | | 0.385 | | | | 0.986 | | | | 0.867 | | | | 0 | | | | 0.594 | | | | 0.999 |
| *AT1G27400* | | | *AT3G62870* | | | | 0.161 | | | | 0 | | | 0 | | | | 0.985 | | | | 0.877 | | | | 0.676 | | | | 0.723 | | | | 0.999 |
| *AT1G27400* | | | *AT2G34480* | | | | 0 | | | | 0 | | | 0 | | | | 0.986 | | | | 0.853 | | | | 0.661 | | | | 0.678 | | | | 0.999 |
| *AT1G27400* | | | *AT2G37190* | | | | 0.178 | | | | 0 | | | 0.281 | | | | 0.986 | | | | 0.867 | | | | 0.673 | | | | 0.33 | | | | 0.999 |
| *AT1G27400* | | | *RPL23AB* | | | | 0.185 | | | | 0 | | | 0.346 | | | | 0.986 | | | | 0.877 | | | | 0.676 | | | | 0.598 | | | | 0.999 |
| *AT1G27400* | | | *AT4G36130* | | | | 0.171 | | | | 0 | | | 0.319 | | | | 0.944 | | | | 0.853 | | | | 0.661 | | | | 0.547 | | | | 0.999 |
| *AT1G27400* | | | *AT4G10450* | | | | 0.181 | | | | 0 | | | 0.367 | | | | 0.966 | | | | 0.867 | | | | 0.673 | | | | 0.826 | | | | 0.999 |
| *AT1G27400* | | | *RPL5B* | | | | 0.19 | | | | 0 | | | 0 | | | | 0.977 | | | | 0.877 | | | | 0.676 | | | | 0.546 | | | | 0.999 |
| *AT1G27400* | | | *AT3G52580* | | | | 0.181 | | | | 0 | | | 0.292 | | | | 0.986 | | | | 0.867 | | | | 0.143 | | | | 0.323 | | | | 0.999 |
| *AT1G27400* | | | *AT3G09630* | | | | 0.175 | | | | 0 | | | 0.261 | | | | 0.968 | | | | 0.877 | | | | 0.676 | | | | 0.778 | | | | 0.999 |
| *AT1G41880* | | | *RPL23AB* | | | | 0 | | | | 0 | | | 0 | | | | 0.986 | | | | 0.853 | | | | 0.661 | | | | 0.247 | | | | 0.999 |
| **Node 1** | | **Node 2** | | | | **Neighborhood** | | | | **Gene fusion** | | | | | **Co-occurrence** | | | | **Co-expression** | | | | **Experiments** | | | | **Database** | | | **Textmining** | | | | **Score** |
| **TRANSCRIPTION AND TRANSLATION** *(Cont.)* | | | | | | | | | | | | | | | | | | | | | | | | | | | | | | | | | | |
| *AT1G41880* | | | *RPL18* | | | | 0 | | | | 0 | | | 0 | | | | 0.985 | | | | 0.82 | | | | 0.645 | | | | 0.382 | | | | 0.999 |
| *AT1G41880* | | | *AT4G15000* | | | | 0 | | | | 0 | | | 0 | | | | 0.985 | | | | 0.82 | | | | 0.645 | | | | 0.584 | | | | 0.999 |
| *AT1G41880* | | | *AT2G20450* | | | | 0 | | | | 0 | | | 0 | | | | 0.984 | | | | 0.853 | | | | 0.661 | | | | 0.59 | | | | 0.999 |
| *AT1G41880* | | | *AT3G05560* | | | | 0 | | | | 0 | | | 0 | | | | 0.984 | | | | 0.82 | | | | 0.645 | | | | 0.269 | | | | 0.999 |
| *AT1G41880* | | | *AT3G62870* | | | | 0 | | | | 0 | | | 0 | | | | 0.981 | | | | 0.853 | | | | 0.661 | | | | 0.479 | | | | 0.999 |
| *AT1G70600* | | | *RPL5B* | | | | 0.19 | | | | 0 | | | 0 | | | | 0.934 | | | | 0.867 | | | | 0.673 | | | | 0.654 | | | | 0.999 |
| *AT1G70600* | | | *AT3G09630* | | | | 0.175 | | | | 0 | | | 0 | | | | 0.92 | | | | 0.867 | | | | 0.904 | | | | 0.507 | | | | 0.999 |
| *AT1G70600* | | | *RPL23AB* | | | | 0.185 | | | | 0 | | | 0 | | | | 0.943 | | | | 0.867 | | | | 0.904 | | | | 0.512 | | | | 0.999 |
| *AT1G70600* | | | *AT4G36130* | | | | 0.171 | | | | 0 | | | 0 | | | | 0.94 | | | | 0.82 | | | | 0.896 | | | | 0.584 | | | | 0.999 |
| *AT1G70600* | | | *AT4G10450* | | | | 0.181 | | | | 0 | | | 0 | | | | 0.933 | | | | 0.847 | | | | 0.899 | | | | 0.464 | | | | 0.999 |
| *AT1G70600* | | | *AT5G15200* | | | | 0.185 | | | | 0 | | | 0 | | | | 0.944 | | | | 0.847 | | | | 0.72 | | | | 0.588 | | | | 0.999 |
| *AT1G70600* | | | *AT3G05560* | | | | 0 | | | | 0 | | | 0 | | | | 0.943 | | | | 0.847 | | | | 0.899 | | | | 0.517 | | | | 0.999 |
| *AT1G70600* | | | *AT3G62870* | | | | 0.065 | | | | 0 | | | 0 | | | | 0.94 | | | | 0.867 | | | | 0.904 | | | | 0.323 | | | | 0.999 |
| *AT1G70600* | | | *AT2G34480* | | | | 0 | | | | 0 | | | 0 | | | | 0.938 | | | | 0.82 | | | | 0.896 | | | | 0.643 | | | | 0.999 |
| *AT1G70600* | | | *AT4G15000* | | | | 0.173 | | | | 0 | | | 0 | | | | 0.945 | | | | 0.847 | | | | 0.899 | | | | 0.321 | | | | 0.999 |
| *AT1G77940* | | | *AT4G15000* | | | | 0 | | | | 0 | | | 0 | | | | 0.982 | | | | 0.82 | | | | 0.645 | | | | 0.543 | | | | 0.999 |
| *AT1G77940* | | | *RPL18* | | | | 0.19 | | | | 0 | | | 0 | | | | 0.982 | | | | 0.82 | | | | 0.645 | | | | 0.508 | | | | 0.999 |
| *AT1G77940* | | | *AT3G62870* | | | | 0 | | | | 0 | | | 0 | | | | 0.961 | | | | 0.853 | | | | 0.661 | | | | 0.592 | | | | 0.999 |
| *AT1G77940* | | | *AT3G05560* | | | | 0 | | | | 0 | | | 0 | | | | 0.982 | | | | 0.82 | | | | 0.645 | | | | 0.566 | | | | 0.999 |
| *AT1G77940* | | | *AT2G20450* | | | | 0 | | | | 0 | | | 0 | | | | 0.974 | | | | 0.853 | | | | 0.661 | | | | 0.507 | | | | 0.999 |
| *AT1G77940* | | | *RPL23AB* | | | | 0 | | | | 0 | | | 0 | | | | 0.986 | | | | 0.853 | | | | 0.661 | | | | 0.108 | | | | 0.999 |
| *AT2G09990* | | | *AT4G34670* | | | | 0 | | | | 0 | | | 0 | | | | 0.929 | | | | 0.867 | | | | 0.965 | | | | 0.46 | | | | 0.999 |
| *AT2G09990* | | | *AT4G15000* | | | | 0.142 | | | | 0 | | | 0 | | | | 0.954 | | | | 0.847 | | | | 0.796 | | | | 0.405 | | | | 0.999 |
| *AT2G09990* | | | *AT5G28060* | | | | 0 | | | | 0 | | | 0 | | | | 0.934 | | | | 0.867 | | | | 0.965 | | | | 0.584 | | | | 0.999 |
| *AT2G09990* | | | *AT3G05560* | | | | 0 | | | | 0 | | | 0 | | | | 0.951 | | | | 0.847 | | | | 0.829 | | | | 0.586 | | | | 0.999 |
| *AT2G09990* | | | *AT5G15200* | | | | 0.179 | | | | 0 | | | 0 | | | | 0.968 | | | | 0.847 | | | | 0.964 | | | | 0.369 | | | | 0.999 |
| *AT2G09990* | | | *AT4G25740* | | | | 0 | | | | 0 | | | 0 | | | | 0.937 | | | | 0.847 | | | | 0.964 | | | | 0.416 | | | | 0.999 |
| *AT2G09990* | | | *AT2G34480* | | | | 0 | | | | 0 | | | 0 | | | | 0.965 | | | | 0.82 | | | | 0.822 | | | | 0.347 | | | | 0.999 |
| *AT2G09990* | | | *AT5G58420* | | | | 0 | | | | 0 | | | 0 | | | | 0.934 | | | | 0.847 | | | | 0.964 | | | | 0.59 | | | | 0.999 |
| *AT2G09990* | | | *AT3G57490* | | | | 0.142 | | | | 0 | | | 0 | | | | 0.85 | | | | 0.729 | | | | 0.958 | | | | 0.494 | | | | 0.999 |
| *AT2G09990* | | | *AT4G10450* | | | | 0.175 | | | | 0 | | | 0 | | | | 0.93 | | | | 0.847 | | | | 0.821 | | | | 0.494 | | | | 0.999 |
| *AT2G09990* | | | *AT4G30800* | | | | 0.172 | | | | 0 | | | 0 | | | | 0.911 | | | | 0.847 | | | | 0.964 | | | | 0.512 | | | | 0.999 |
| *AT2G09990* | | | *AT5G59240* | | | | 0 | | | | 0 | | | 0 | | | | 0.908 | | | | 0.867 | | | | 0.965 | | | | 0.613 | | | | 0.999 |
| **Node 1** | | | **Node 2** | | | | **Neighborhood** | | | | **Gene fusion** | | | **Co-occurrence** | | | | **Co-expression** | | | | **Experiments** | | | | **Database** | | | | **Textmining** | | | | **Score** |
| **TRANSCRIPTION AND TRANSLATION** *(Cont.)* | | | | | | | | | | | | | | | | | | | | | | | | | | | | | | | | | | |
| *AT2G20450* | | | *AT4G15000* | | | | 0 | | | | 0 | | | 0 | | | | 0.986 | | | | 0.867 | | | | 0.673 | | | | 0.601 | | | | 0.999 |
| *AT2G20450* | | | *AT2G37600* | | | | 0 | | | | 0 | | | 0 | | | | 0.982 | | | | 0.867 | | | | 0.673 | | | | 0.599 | | | | 0.999 |
| *AT2G20450* | | | *RPL18* | | | | 0 | | | | 0 | | | 0 | | | | 0.982 | | | | 0.867 | | | | 0.673 | | | | 0.555 | | | | 0.999 |
| *AT2G20450* | | | *AT3G05560* | | | | 0 | | | | 0 | | | 0 | | | | 0.986 | | | | 0.867 | | | | 0.673 | | | | 0.602 | | | | 0.999 |
| *AT2G20450* | | | *AT5G58420* | | | | 0.176 | | | | 0 | | | 0 | | | | 0.985 | | | | 0.867 | | | | 0 | | | | 0.464 | | | | 0.999 |
| *AT2G20450* | | | *AT3G62870* | | | | 0.059 | | | | 0 | | | 0 | | | | 0.949 | | | | 0.877 | | | | 0.676 | | | | 0.592 | | | | 0.999 |
| *AT2G20450* | | | *AT2G34480* | | | | 0 | | | | 0 | | | 0 | | | | 0.967 | | | | 0.853 | | | | 0.661 | | | | 0.591 | | | | 0.999 |
| *AT2G20450* | | | *AT2G37190* | | | | 0 | | | | 0 | | | 0 | | | | 0.968 | | | | 0.867 | | | | 0.673 | | | | 0.512 | | | | 0.999 |
| *AT2G20450* | | | *RPL23AB* | | | | 0.177 | | | | 0 | | | 0 | | | | 0.986 | | | | 0.877 | | | | 0.676 | | | | 0.835 | | | | 0.999 |
| *AT2G20450* | | | *AT4G10450* | | | | 0.173 | | | | 0 | | | 0 | | | | 0.985 | | | | 0.867 | | | | 0.673 | | | | 0.845 | | | | 0.999 |
| *AT2G20450* | | | *RPL5B* | | | | 0.189 | | | | 0 | | | 0 | | | | 0.96 | | | | 0.877 | | | | 0.676 | | | | 0.637 | | | | 0.999 |
| *AT2G20450* | | | *AT3G09630* | | | | 0.142 | | | | 0 | | | 0 | | | | 0.943 | | | | 0.877 | | | | 0.676 | | | | 0.609 | | | | 0.999 |
| *AT2G34480* | | | *AT3G05560* | | | | 0 | | | | 0 | | | 0 | | | | 0.965 | | | | 0.82 | | | | 0.896 | | | | 0.632 | | | | 0.999 |
| *AT2G34480* | | | *AT5G15200* | | | | 0 | | | | 0 | | | 0 | | | | 0.985 | | | | 0.82 | | | | 0.72 | | | | 0.059 | | | | 0.999 |
| *AT2G34480* | | | *AT3G62870* | | | | 0 | | | | 0 | | | 0 | | | | 0.986 | | | | 0.853 | | | | 0.901 | | | | 0.696 | | | | 0.999 |
| *AT2G34480* | | | *AT4G34670* | | | | 0 | | | | 0 | | | 0 | | | | 0.977 | | | | 0.853 | | | | 0.72 | | | | 0.056 | | | | 0.999 |
| *AT2G34480* | | | *RPL18* | | | | 0 | | | | 0 | | | 0 | | | | 0.985 | | | | 0.82 | | | | 0.645 | | | | 0.225 | | | | 0.999 |
| *AT2G34480* | | | *AT4G15000* | | | | 0 | | | | 0 | | | 0 | | | | 0.985 | | | | 0.82 | | | | 0.896 | | | | 0.244 | | | | 0.999 |
| *AT2G34480* | | | *AT3G09630* | | | | 0 | | | | 0 | | | 0 | | | | 0.982 | | | | 0.853 | | | | 0.901 | | | | 0.718 | | | | 0.999 |
| *AT2G34480* | | | *RPL23AB* | | | | 0 | | | | 0 | | | 0 | | | | 0.969 | | | | 0.853 | | | | 0.901 | | | | 0.477 | | | | 0.999 |
| *AT2G34480* | | | *AT2G37190* | | | | 0.182 | | | | 0 | | | 0 | | | | 0.982 | | | | 0.82 | | | | 0.645 | | | | 0.352 | | | | 0.999 |
| *AT2G34480* | | | *AT4G10450* | | | | 0 | | | | 0 | | | 0 | | | | 0.938 | | | | 0.82 | | | | 0.896 | | | | 0.734 | | | | 0.999 |
| *AT2G37190* | | | *AT4G10450* | | | | 0.178 | | | | 0 | | | 0.241 | | | | 0.951 | | | | 0.847 | | | | 0.656 | | | | 0.569 | | | | 0.999 |
| *AT2G37190* | | | *RPL23AB* | | | | 0.182 | | | | 0 | | | 0.203 | | | | 0.982 | | | | 0.867 | | | | 0.673 | | | | 0.517 | | | | 0.999 |
| *AT2G37190* | | | *AT3G09630* | | | | 0.172 | | | | 0 | | | 0 | | | | 0.944 | | | | 0.867 | | | | 0.673 | | | | 0.595 | | | | 0.999 |
| *AT2G37190* | | | *RPL5B* | | | | 0.19 | | | | 0 | | | 0 | | | | 0.968 | | | | 0.867 | | | | 0.673 | | | | 0.6 | | | | 0.999 |
| *AT2G37190* | | | *RPL18* | | | | 0 | | | | 0 | | | 0 | | | | 0.982 | | | | 0.847 | | | | 0.656 | | | | 0.383 | | | | 0.999 |
| *AT2G37190* | | | *AT4G15000* | | | | 0 | | | | 0 | | | 0 | | | | 0.985 | | | | 0.847 | | | | 0.656 | | | | 0.544 | | | | 0.999 |
| *AT2G37190* | | | *AT3G62870* | | | | 0.059 | | | | 0 | | | 0 | | | | 0.985 | | | | 0.867 | | | | 0.673 | | | | 0.61 | | | | 0.999 |
| *AT2G37190* | | | *AT3G05560* | | | | 0 | | | | 0 | | | 0 | | | | 0.984 | | | | 0.847 | | | | 0.656 | | | | 0.594 | | | | 0.999 |
| *AT2G37190* | | | *AT5G28060* | | | | 0 | | | | 0 | | | 0.224 | | | | 0.982 | | | | 0.867 | | | | 0 | | | | 0.564 | | | | 0.999 |
| *AT2G37600* | | | *RPL23AB* | | | | 0 | | | | 0 | | | 0 | | | | 0.982 | | | | 0.867 | | | | 0.673 | | | | 0.595 | | | | 0.999 |
| *AT2G37600* | | | *AT4G10450* | | | | 0 | | | | 0 | | | 0 | | | | 0.982 | | | | 0.847 | | | | 0.656 | | | | 0.764 | | | | 0.999 |
| **Node 1** | | | **Node 2** | | | | **Neighborhood** | | | | **Gene fusion** | | | **Co-occurrence** | | | | **Co-expression** | | | | **Experiments** | | | | **Database** | | | | **Textmining** | | | | **Score** |
| **TRANSCRIPTION AND TRANSLATION** *(Cont.)* | | | | | | | | | | | | | | | | | | | | | | | | | | | | | | | | | | |
| *AT2G37600* | | | *AT4G15000* | | | | 0 | | | | 0 | | | 0 | | | | 0.982 | | | | 0.847 | | | | 0.656 | | | | 0.595 | | | | 0.999 |
| *AT2G37600* | | | *RPL18* | | | | 0 | | | | 0 | | | 0 | | | | 0.966 | | | | 0.847 | | | | 0.656 | | | | 0.835 | | | | 0.999 |
| *AT2G43030* | | | *RPS9* | | | | 0.19 | | | | 0 | | | 0.242 | | | | 0.982 | | | | 0.876 | | | | 0 | | | | 0.544 | | | | 0.999 |
| *AT2G43030* | | | *AT4G01310* | | | | 0.185 | | | | 0 | | | 0.311 | | | | 0.986 | | | | 0.898 | | | | 0.424 | | | | 0.287 | | | | 0.999 |
| *AT3G05560* | | | *AT4G15000* | | | | 0 | | | | 0 | | | 0 | | | | 0.986 | | | | 0.847 | | | | 0.899 | | | | 0.896 | | | | 0.999 |
| *AT3G05560* | | | *RPL18* | | | | 0 | | | | 0 | | | 0 | | | | 0.975 | | | | 0.847 | | | | 0.656 | | | | 0.574 | | | | 0.999 |
| *AT3G05560* | | | *AT3G62870* | | | | 0 | | | | 0 | | | 0 | | | | 0.982 | | | | 0.867 | | | | 0.904 | | | | 0.308 | | | | 0.999 |
| *AT3G05560* | | | *AT5G15200* | | | | 0 | | | | 0 | | | 0 | | | | 0.976 | | | | 0.847 | | | | 0.72 | | | | 0.596 | | | | 0.999 |
| *AT3G05560* | | | *AT5G28060* | | | | 0 | | | | 0 | | | 0 | | | | 0.95 | | | | 0.867 | | | | 0.72 | | | | 0.585 | | | | 0.999 |
| *AT3G05560* | | | *AT4G10450* | | | | 0 | | | | 0 | | | 0 | | | | 0.982 | | | | 0.847 | | | | 0.899 | | | | 0.588 | | | | 0.999 |
| *AT3G05560* | | | *AT4G36130* | | | | 0 | | | | 0 | | | 0 | | | | 0.938 | | | | 0.82 | | | | 0.896 | | | | 0.33 | | | | 0.999 |
| *AT3G05560* | | | *RPL23AB* | | | | 0 | | | | 0 | | | 0 | | | | 0.986 | | | | 0.867 | | | | 0.904 | | | | 0.727 | | | | 0.999 |
| *AT3G05560* | | | *AT3G09630* | | | | 0 | | | | 0 | | | 0 | | | | 0.961 | | | | 0.867 | | | | 0.904 | | | | 0.607 | | | | 0.999 |
| *AT3G05560* | | | *RPL5B* | | | | 0 | | | | 0 | | | 0 | | | | 0.968 | | | | 0.867 | | | | 0.673 | | | | 0.615 | | | | 0.999 |
| *AT3G09630* | | | *RPL18* | | | | 0.184 | | | | 0 | | | 0 | | | | 0.985 | | | | 0.867 | | | | 0.673 | | | | 0.598 | | | | 0.999 |
| *AT3G09630* | | | *RPL23AB* | | | | 0.179 | | | | 0 | | | 0.228 | | | | 0.936 | | | | 0.877 | | | | 0.905 | | | | 0.383 | | | | 0.999 |
| *AT3G09630* | | | *AT4G36130* | | | | 0.121 | | | | 0 | | | 0.234 | | | | 0.939 | | | | 0.853 | | | | 0.901 | | | | 0.602 | | | | 0.999 |
| *AT3G09630* | | | *AT4G10450* | | | | 0.175 | | | | 0 | | | 0.248 | | | | 0.934 | | | | 0.867 | | | | 0.904 | | | | 0.819 | | | | 0.999 |
| *AT3G09630* | | | *RPL5B* | | | | 0.19 | | | | 0 | | | 0 | | | | 0.955 | | | | 0.877 | | | | 0.676 | | | | 0.653 | | | | 0.999 |
| *AT3G09630* | | | *AT4G34670* | | | | 0 | | | | 0 | | | 0.345 | | | | 0.957 | | | | 0.877 | | | | 0.838 | | | | 0.602 | | | | 0.999 |
| *AT3G09630* | | | *AT4G15000* | | | | 0.142 | | | | 0 | | | 0 | | | | 0.95 | | | | 0.867 | | | | 0.904 | | | | 0.509 | | | | 0.999 |
| *AT3G09630* | | | *AT5G15200* | | | | 0.179 | | | | 0 | | | 0 | | | | 0.968 | | | | 0.867 | | | | 0.822 | | | | 0.587 | | | | 0.999 |
| *AT3G09630* | | | *AT5G28060* | | | | 0 | | | | 0 | | | 0 | | | | 0.925 | | | | 0.877 | | | | 0.838 | | | | 0.516 | | | | 0.999 |
| *AT3G09630* | | | *AT3G62870* | | | | 0.121 | | | | 0 | | | 0 | | | | 0.976 | | | | 0.877 | | | | 0.905 | | | | 0.838 | | | | 0.999 |
| *AT3G09630* | | | *AT5G58420* | | | | 0 | | | | 0 | | | 0.391 | | | | 0.982 | | | | 0.867 | | | | 0.419 | | | | 0.587 | | | | 0.999 |
| *AT3G52580* | | | *PFL* | | | | 0.181 | | | | 0 | | | 0 | | | | 0.979 | | | | 0.774 | | | | 0.638 | | | | 0.517 | | | | 0.999 |
| *AT3G52580* | | | *RPS20A* | | | | 0.185 | | | | 0 | | | 0 | | | | 0.984 | | | | 0.82 | | | | 0.642 | | | | 0.585 | | | | 0.999 |
| *AT3G52580* | | | *AT4G15000* | | | | 0.173 | | | | 0 | | | 0 | | | | 0.982 | | | | 0.847 | | | | 0.254 | | | | 0.512 | | | | 0.999 |
| *AT3G52580* | | | *AT5G15200* | | | | 0.185 | | | | 0 | | | 0 | | | | 0.954 | | | | 0.847 | | | | 0.654 | | | | 0.598 | | | | 0.999 |
| *AT3G52580* | | | *AT4G25740* | | | | 0 | | | | 0 | | | 0 | | | | 0.96 | | | | 0.847 | | | | 0.655 | | | | 0.596 | | | | 0.999 |
| *AT3G52580* | | | *AT5G58420* | | | | 0 | | | | 0 | | | 0.291 | | | | 0.982 | | | | 0.847 | | | | 0.654 | | | | 0.417 | | | | 0.999 |
| *AT3G52580* | | | *RPL23AB* | | | | 0.185 | | | | 0 | | | 0.273 | | | | 0.984 | | | | 0.867 | | | | 0.257 | | | | 0.417 | | | | 0.999 |
| *AT3G57490* | | | *AT4G34670* | | | | 0 | | | | 0 | | | 0.304 | | | | 0.912 | | | | 0.785 | | | | 0.962 | | | | 0.355 | | | | 0.999 |
| **Node 1** | | | **Node 2** | | | | **Neighborhood** | | | | **Gene fusion** | | | **Co-occurrence** | | | | **Co-expression** | | | | **Experiments** | | | | **Database** | | | | **Textmining** | | | | **Score** |
| **TRANSCRIPTION AND TRANSLATION** *(Cont.)* | | | | | | | | | | | | | | | | | | | | | | | | | | | | | | | | | | |
| *AT3G57490* | | | *AT5G58420* | | | | 0.182 | | | | 0 | | | 0.331 | | | | 0.903 | | | | 0.729 | | | | 0.958 | | | | 0.476 | | | | 0.999 |
| *AT3G57490* | | | *AT4G25740* | | | | 0 | | | | 0 | | | 0 | | | | 0.859 | | | | 0.729 | | | | 0.958 | | | | 0.496 | | | | 0.999 |
| *AT3G57490* | | | *AT5G15200* | | | | 0.177 | | | | 0 | | | 0 | | | | 0.85 | | | | 0.729 | | | | 0.958 | | | | 0.476 | | | | 0.999 |
| *AT3G57490* | | | *AT5G28060* | | | | 0 | | | | 0 | | | 0 | | | | 0.908 | | | | 0.785 | | | | 0.962 | | | | 0.518 | | | | 0.999 |
| *AT3G57490* | | | *AT5G59240* | | | | 0 | | | | 0 | | | 0 | | | | 0.912 | | | | 0.785 | | | | 0.962 | | | | 0.558 | | | | 0.999 |
| *AT3G57490* | | | *AT4G30800* | | | | 0.162 | | | | 0 | | | 0 | | | | 0.893 | | | | 0.729 | | | | 0.958 | | | | 0.489 | | | | 0.999 |
| *AT3G62870* | | | *RPL18* | | | | 0.149 | | | | 0 | | | 0 | | | | 0.986 | | | | 0.867 | | | | 0.673 | | | | 0.547 | | | | 0.999 |
| *AT3G62870* | | | *RPL23AB* | | | | 0.175 | | | | 0 | | | 0 | | | | 0.973 | | | | 0.877 | | | | 0.905 | | | | 0.326 | | | | 0.999 |
| *AT3G62870* | | | *AT5G28060* | | | | 0 | | | | 0 | | | 0 | | | | 0.951 | | | | 0.877 | | | | 0.835 | | | | 0.593 | | | | 0.999 |
| *AT3G62870* | | | *AT5G15200* | | | | 0.174 | | | | 0 | | | 0 | | | | 0.984 | | | | 0.867 | | | | 0.821 | | | | 0.163 | | | | 0.999 |
| *AT3G62870* | | | *AT5G58420* | | | | 0 | | | | 0 | | | 0 | | | | 0.985 | | | | 0.867 | | | | 0.394 | | | | 0.582 | | | | 0.999 |
| *AT3G62870* | | | *AT4G34670* | | | | 0 | | | | 0 | | | 0 | | | | 0.984 | | | | 0.877 | | | | 0.835 | | | | 0.604 | | | | 0.999 |
| *AT3G62870* | | | *AT4G15000* | | | | 0.059 | | | | 0 | | | 0 | | | | 0.973 | | | | 0.867 | | | | 0.904 | | | | 0.367 | | | | 0.999 |
| *AT3G62870* | | | *RPL5B* | | | | 0.131 | | | | 0 | | | 0 | | | | 0.964 | | | | 0.877 | | | | 0.676 | | | | 0.646 | | | | 0.999 |
| *AT3G62870* | | | *AT4G10450* | | | | 0.078 | | | | 0 | | | 0 | | | | 0.941 | | | | 0.867 | | | | 0.904 | | | | 0.644 | | | | 0.999 |
| *AT3G62870* | | | *AT4G36130* | | | | 0.104 | | | | 0 | | | 0 | | | | 0.941 | | | | 0.853 | | | | 0.901 | | | | 0.518 | | | | 0.999 |
| *AT4G01310* | | | *RPS9* | | | | 0.19 | | | | 0 | | | 0.338 | | | | 0.986 | | | | 0.883 | | | | 0 | | | | 0.755 | | | | 0.999 |
| *AT4G10450* | | | *RPL23AB* | | | | 0.185 | | | | 0 | | | 0.351 | | | | 0.985 | | | | 0.867 | | | | 0.904 | | | | 0.49 | | | | 0.999 |
| *AT4G10450* | | | *AT5G15200* | | | | 0.185 | | | | 0 | | | 0 | | | | 0.949 | | | | 0.847 | | | | 0.72 | | | | 0.595 | | | | 0.999 |
| *AT4G10450* | | | *AT5G28060* | | | | 0 | | | | 0 | | | 0 | | | | 0.955 | | | | 0.867 | | | | 0.72 | | | | 0.568 | | | | 0.999 |
| *AT4G10450* | | | *AT4G15000* | | | | 0.173 | | | | 0 | | | 0 | | | | 0.983 | | | | 0.847 | | | | 0.899 | | | | 0.521 | | | | 0.999 |
| *AT4G10450* | | | *RPL5B* | | | | 0.19 | | | | 0 | | | 0 | | | | 0.949 | | | | 0.867 | | | | 0.673 | | | | 0.559 | | | | 0.999 |
| *AT4G10450* | | | *AT4G36130* | | | | 0.171 | | | | 0 | | | 0.315 | | | | 0.925 | | | | 0.82 | | | | 0.896 | | | | 0.544 | | | | 0.999 |
| *AT4G15000* | | | *RPL18* | | | | 0 | | | | 0 | | | 0 | | | | 0.985 | | | | 0.847 | | | | 0.656 | | | | 0.596 | | | | 0.999 |
| *AT4G15000* | | | *RPL23AB* | | | | 0.177 | | | | 0 | | | 0 | | | | 0.986 | | | | 0.867 | | | | 0.904 | | | | 0.581 | | | | 0.999 |
| *AT4G15000* | | | *RPL5B* | | | | 0.189 | | | | 0 | | | 0 | | | | 0.968 | | | | 0.867 | | | | 0.673 | | | | 0.602 | | | | 0.999 |
| *AT4G15000* | | | *AT4G36130* | | | | 0.109 | | | | 0 | | | 0 | | | | 0.937 | | | | 0.82 | | | | 0.896 | | | | 0.414 | | | | 0.999 |
| *AT4G15000* | | | *AT5G28060* | | | | 0 | | | | 0 | | | 0 | | | | 0.982 | | | | 0.867 | | | | 0.72 | | | | 0.609 | | | | 0.999 |
| *AT4G15000* | | | *AT5G15200* | | | | 0.177 | | | | 0 | | | 0 | | | | 0.983 | | | | 0.847 | | | | 0.72 | | | | 0.515 | | | | 0.999 |
| *AT4G15000* | | | *AT4G34670* | | | | 0 | | | | 0 | | | 0 | | | | 0.944 | | | | 0.867 | | | | 0.72 | | | | 0.601 | | | | 0.999 |
| *AT4G25740* | | | *PFL* | | | | 0 | | | | 0 | | | 0 | | | | 0.952 | | | | 0.774 | | | | 0.638 | | | | 0.787 | | | | 0.999 |
| *AT4G25740* | | | *AT4G34670* | | | | 0 | | | | 0 | | | 0 | | | | 0.928 | | | | 0.867 | | | | 0.965 | | | | 0.613 | | | | 0.999 |
| *AT4G25740* | | | *AT5G15200* | | | | 0 | | | | 0 | | | 0 | | | | 0.949 | | | | 0.847 | | | | 0.964 | | | | 0.655 | | | | 0.999 |
| **Node 1** | | | **Node 2** | | | | **Neighborhood** | | | | **Gene fusion** | | | **Co-occurrence** | | | | **Co-expression** | | | | **Experiments** | | | | **Database** | | | | **Textmining** | | | | **Score** |
| **TRANSCRIPTION AND TRANSLATION** *(Cont.)* | | | | | | | | | | | | | | | | | | | | | | | | | | | | | | | | | | |
| *AT4G25740* | | | *AT5G28060* | | | | 0 | | | | 0 | | | 0 | | | | 0.928 | | | | 0.867 | | | | 0.965 | | | | 0.856 | | | | 0.999 |
| *AT4G25740* | | | *AT5G58420* | | | | 0 | | | | 0 | | | 0 | | | | 0.94 | | | | 0.847 | | | | 0.964 | | | | 0.462 | | | | 0.999 |
| *AT4G25740* | | | *AT4G30800* | | | | 0 | | | | 0 | | | 0 | | | | 0.926 | | | | 0.847 | | | | 0.964 | | | | 0.592 | | | | 0.999 |
| *AT4G25740* | | | *AT5G59240* | | | | 0 | | | | 0 | | | 0 | | | | 0.91 | | | | 0.867 | | | | 0.965 | | | | 0.602 | | | | 0.999 |
| *AT4G30800* | | | *AT5G59240* | | | | 0 | | | | 0 | | | 0 | | | | 0.926 | | | | 0.867 | | | | 0.965 | | | | 0.605 | | | | 0.999 |
| *AT4G30800* | | | *AT5G15200* | | | | 0.182 | | | | 0 | | | 0.223 | | | | 0.926 | | | | 0.847 | | | | 0.964 | | | | 0.486 | | | | 0.999 |
| *AT4G30800* | | | *AT5G28060* | | | | 0 | | | | 0 | | | 0 | | | | 0.92 | | | | 0.867 | | | | 0.965 | | | | 0.6 | | | | 0.999 |
| *AT4G30800* | | | *AT5G58420* | | | | 0.187 | | | | 0 | | | 0.321 | | | | 0.939 | | | | 0.847 | | | | 0.964 | | | | 0.349 | | | | 0.999 |
| *AT4G30800* | | | *AT4G34670* | | | | 0 | | | | 0 | | | 0 | | | | 0.916 | | | | 0.867 | | | | 0.965 | | | | 0.614 | | | | 0.999 |
| *AT4G34670* | | | *RPL23AB* | | | | 0 | | | | 0 | | | 0.239 | | | | 0.934 | | | | 0.877 | | | | 0.72 | | | | 0.544 | | | | 0.999 |
| *AT4G34670* | | | *AT5G58420* | | | | 0 | | | | 0 | | | 0.375 | | | | 0.959 | | | | 0.867 | | | | 0.965 | | | | 0.545 | | | | 0.999 |
| *AT4G34670* | | | *AT5G28060* | | | | 0.059 | | | | 0 | | | 0 | | | | 0.947 | | | | 0.877 | | | | 0.966 | | | | 0.602 | | | | 0.999 |
| *AT4G34670* | | | *AT5G15200* | | | | 0 | | | | 0 | | | 0 | | | | 0.968 | | | | 0.867 | | | | 0.965 | | | | 0.592 | | | | 0.999 |
| *AT4G34670* | | | *AT5G59240* | | | | 0 | | | | 0 | | | 0.223 | | | | 0.907 | | | | 0.877 | | | | 0.966 | | | | 0.661 | | | | 0.999 |
| *AT4G36130* | | | *RPL23AB* | | | | 0.175 | | | | 0 | | | 0.281 | | | | 0.931 | | | | 0.853 | | | | 0.901 | | | | 0.497 | | | | 0.999 |
| *AT5G15200* | | | *PFL* | | | | 0.185 | | | | 0 | | | 0 | | | | 0.979 | | | | 0.774 | | | | 0.638 | | | | 0.507 | | | | 0.999 |
| *AT5G15200* | | | *RPL18* | | | | 0.19 | | | | 0 | | | 0 | | | | 0.986 | | | | 0.847 | | | | 0 | | | | 0.547 | | | | 0.999 |
| *AT5G15200* | | | *AT5G28060* | | | | 0 | | | | 0 | | | 0 | | | | 0.955 | | | | 0.867 | | | | 0.965 | | | | 0.155 | | | | 0.999 |
| *AT5G15200* | | | *AT5G58420* | | | | 0 | | | | 0 | | | 0 | | | | 0.963 | | | | 0.847 | | | | 0.964 | | | | 0.68 | | | | 0.999 |
| *AT5G15200* | | | *AT5G59240* | | | | 0 | | | | 0 | | | 0 | | | | 0.908 | | | | 0.867 | | | | 0.965 | | | | 0.589 | | | | 0.999 |
| *AT5G28060* | | | *PFL* | | | | 0 | | | | 0 | | | 0 | | | | 0.982 | | | | 0.841 | | | | 0.652 | | | | 0.589 | | | | 0.999 |
| *AT5G28060* | | | *RPS20A* | | | | 0 | | | | 0 | | | 0 | | | | 0.968 | | | | 0.853 | | | | 0.661 | | | | 0.592 | | | | 0.999 |
| *AT5G28060* | | | *RPL23AB* | | | | 0 | | | | 0 | | | 0 | | | | 0.972 | | | | 0.877 | | | | 0.72 | | | | 0.712 | | | | 0.999 |
| *AT5G28060* | | | *AT5G58420* | | | | 0 | | | | 0 | | | 0 | | | | 0.962 | | | | 0.867 | | | | 0.965 | | | | 0.509 | | | | 0.999 |
| *AT5G28060* | | | *AT5G59240* | | | | 0 | | | | 0 | | | 0 | | | | 0.906 | | | | 0.877 | | | | 0.966 | | | | 0.668 | | | | 0.999 |
| *AT5G58420* | | | *PFL* | | | | 0 | | | | 0 | | | 0 | | | | 0.983 | | | | 0.774 | | | | 0.638 | | | | 0.677 | | | | 0.999 |
| *AT5G58420* | | | *RPL23AB* | | | | 0.19 | | | | 0 | | | 0.309 | | | | 0.986 | | | | 0.867 | | | | 0 | | | | 0.417 | | | | 0.999 |
| *AT5G58420* | | | *AT5G59240* | | | | 0 | | | | 0 | | | 0.257 | | | | 0.919 | | | | 0.867 | | | | 0.965 | | | | 0.59 | | | | 0.999 |
| *PFL* | | | *RPL23AB* | | | | 0.185 | | | | 0 | | | 0 | | | | 0.984 | | | | 0.841 | | | | 0 | | | | 0.691 | | | | 0.999 |
| *RPL18* | | | *RPL23AB* | | | | 0 | | | | 0 | | | 0 | | | | 0.983 | | | | 0.867 | | | | 0.673 | | | | 0.355 | | | | 0.999 |
| *RPL18* | | | *RPL5B* | | | | 0 | | | | 0 | | | 0 | | | | 0.982 | | | | 0.867 | | | | 0.673 | | | | 0.597 | | | | 0.999 |
| *RPL23AB* | | | *RPL5B* | | | | 0.19 | | | | 0 | | | 0 | | | | 0.968 | | | | 0.877 | | | | 0.676 | | | | 0.629 | | | | 0.999 |
|  | | |  | | | |  | | | |  | | |  | | | |  | | | |  | | | |  | | | |  | | | |  |
| **Node 1** | | | | **Node 2** | | | | **Neighborhood** | | | | **Gene fusion** | | | | **Co-occurrence** | | | | **Co-expression** | | | | **Experiments** | | | | **Database** | | | **Textmining** | | **Score** | |
| **TRANSPORT** | | | | | | | | | | | | | | | | | | | | | | | | | | | | | | | | | | |
| *AT1G62020* | | | | *AT5G05010* | | | | 0 | | | | 0 | | | | 0 | | | | 0.921 | | | | 0.969 | | | | 0.846 | | | 0.73 | | 0.999 | |
| *AT1G62020* | | | | *AT4G34450* | | | | 0 | | | | 0 | | | | 0 | | | | 0.928 | | | | 0.874 | | | | 0.844 | | | 0.671 | | 0.999 | |
| *AT4G34450* | | | | *AT5G05010* | | | | 0 | | | | 0 | | | | 0 | | | | 0.922 | | | | 0.886 | | | | 0.846 | | | 0.73 | | 0.999 | |
